# Supplementary material for: Interface damage and fracture mechanisms of a ceramic/polymer interface based on atomic-scale simulations
Source: Royal Society of Chemistry journal article supplement (doi:10.1039/d2cp04545a), 2022-01-01
Supplement: d2cp04545a3.pdf [file d2cp04545a3.pdf]

## Supplementary material 1

Values of the parameters in CVFF and CLAYFF force fields are shown in Tables S1-S5 [45-46].

Table S1 Masses and Charges

| Items | Species                             | Styles | Masses (g/mol) | Charges ( $e$ ) |
|-------|-------------------------------------|--------|----------------|-----------------|
| 1     | Hydrogen bonded to C                | h      | 1.007970       | 0.1             |
| 2     | Sp3 carbon in methyl (CH3) group    | c3     | 12.011150      | -0.3            |
| 3     | Sp3 carbon bonded to 1 H, 3 C atoms | c1     | 12.011150      | -0.1            |
| 4     | Sp3 carbon bonded to 2 H, 2 C atoms | c2     | 12.011150      | -0.2            |
| 5     | Zeolite oxygen                      | oz     | 15.999400      | -1.05           |
| 6     | Hydroxyl oxygen                     | oh     | 15.999400      | -0.95           |
| 7     | Zeolite silicon                     | sz     | 28.086000      | 2.1             |
| 8     | Hydroxyl hydrogen                   | ho     | 1.007970       | 0.425           |

Table S2 Pair Coefficients

| Items | Styles | Constant values       |               |
|-------|--------|-----------------------|---------------|
|       |        | $\epsilon$ (Kcal/mol) | $\sigma$ (nm) |
| 1     | h      | 0.0380000011          | 0.24499714540 |
| 2     | c3     | 0.0389999952          | 0.38754094636 |
| 3     | c1     | 0.0380000011          | 0.38754094636 |
| 4     | c2     | 0.0389999952          | 0.38754094636 |
| 5     | oz     | 0.1554000000          | 0.31655413253 |
| 6     | oh     | 0.1554000000          | 0.31655413253 |
| 7     | sz     | 0.0000018405          | 0.33020270089 |
| 8     | ho     | 0.0000000000          | 0.00000000000 |

Table S3 Bond Coefficients

| Items | Styles | Constant values                  |            |
|-------|--------|----------------------------------|------------|
|       |        | $k_b$ (Kcal/mol·Å <sup>2</sup> ) | $r_0$ (nm) |
| 1     | h-c3   | 340.6175                         | 0.11050    |
| 2     | c3-c1  | 322.7158                         | 0.15260    |
| 3     | h-c1   | 340.6175                         | 0.11050    |
| 4     | c1-c2  | 322.7158                         | 0.15260    |
| 5     | h-c2   | 340.6175                         | 0.11050    |
| 6     | c1-c1  | 322.7158                         | 0.15260    |
| 7     | c2-c2  | 322.7158                         | 0.15260    |
| 8     | oh-ho  | 554.1349                         | 0.10000    |

Table S4 Angle Coefficients

| Items | Styles   | Constant values  |                |
|-------|----------|------------------|----------------|
|       |          | $k_a$ (Kcal/mol) | $\theta_0$ (°) |
| 1     | h-c3-c1  | 44.4000          | 110.0000       |
| 2     | h-c3-h   | 39.5000          | 106.4000       |
| 3     | h-c1-c3  | 44.4000          | 110.0000       |
| 4     | c3-c1-c3 | 46.6000          | 110.5000       |
| 5     | c3-c1-c2 | 46.6000          | 110.5000       |
| 6     | h-c1-c2  | 44.4000          | 110.0000       |
| 7     | c1-c2-c1 | 46.6000          | 110.5000       |
| 8     | h-c2-c1  | 44.4000          | 110.0000       |
| 9     | h-c3-h   | 39.5000          | 106.4000       |
| 10    | c2-c1-c2 | 46.6000          | 110.5000       |
| 11    | c1-c1-c2 | 46.6000          | 110.5000       |
| 12    | h-c1-c1  | 44.4000          | 110.0000       |
| 13    | c3-c1-c1 | 46.6000          | 110.5000       |
| 14    | c1-c2-c2 | 46.6000          | 110.5000       |
| 15    | h-c1-c1  | 44.4000          | 110.0000       |
| 16    | sz-oh-ho | 30.0000          | 109.4700       |

Table S5 Torsion Coefficients

| Items | Styles      | Constant values  |     |              |
|-------|-------------|------------------|-----|--------------|
|       |             | $k_t$ (Kcal/mol) | $n$ | $\phi_0$ (°) |
| 1     | h-c3-c1-h   | 0.1581           | 3   | 180          |
| 2     | h-c3-c1-c3  | 0.1581           | 3   | 180          |
| 3     | h-c3-c1-c2  | 0.1581           | 3   | 180          |
| 4     | c3-c1-c2-c1 | 0.1581           | 3   | 180          |
| 5     | c3-c1-c2-h  | 0.1581           | 3   | 180          |
| 6     | h-c1-c2-c1  | 0.1581           | 3   | 180          |
| 7     | h-c1-c2-h   | 0.1581           | 3   | 180          |
| 8     | c2-c1-c2-c1 | 0.1581           | 3   | 180          |
| 9     | c2-c1-c2-h  | 0.1581           | 3   | 180          |
| 10    | c1-c1-c2-c1 | 0.1581           | 3   | 180          |
| 11    | c1-c1-c2-h  | 0.1581           | 3   | 180          |
| 12    | h-c3-c1-c1  | 0.1581           | 3   | 180          |
| 13    | c2-c1-c1-c2 | 0.1581           | 3   | 180          |
| 14    | h-c1-c1-c2  | 0.1581           | 3   | 180          |
| 15    | c3-c1-c1-c2 | 0.1581           | 3   | 180          |
| 16    | h-c1-c1-h   | 0.1581           | 3   | 180          |
| 17    | h-c1-c1-c3  | 0.1581           | 3   | 180          |
| 18    | c3-c1-c1-c3 | 0.1581           | 3   | 180          |
| 19    | c1-c1-c2-c2 | 0.1581           | 3   | 180          |
| 20    | h-c1-c2-c2  | 0.1581           | 3   | 180          |

|    |             |        |   |     |
|----|-------------|--------|---|-----|
| 21 | c3-c1-c2-c2 | 0.1581 | 3 | 180 |
| 22 | c1-c2-c2-c1 | 0.1581 | 3 | 180 |
| 23 | h-c2-c2-c1  | 0.1581 | 3 | 180 |
| 24 | h-c2-c2-h   | 0.1581 | 3 | 180 |
| 25 | c2-c1-c2-c2 | 0.1581 | 3 | 180 |
